# Supplementary material for: Can we improve coaches’ injury prevention views and implementation practices in the community female Gaelic sport of camogie?
Source: PubMed Central journal article supplement — BMJ Open Sport Exerc Med. 2020 Apr 6;6(1):e000732. doi: 10.1136/bmjsem-2019-000732 (PMC7254110; doi:10.1136/bmjsem-2019-000732), 2020-04-06
Supplement: bmjsem-2019-000732supp001.pdf [file bmjsem-2019-000732supp001.pdf]

**Supplementary material 1. Means and SDs for dependent measures and effect sizes of main and interaction effects pre, post and 4-weeks following the workshop**

|                          | Gender | Pre   |      | Post  |      | 4-Week |      | Main Effect |            |       |            | Interaction effect |            |
|--------------------------|--------|-------|------|-------|------|--------|------|-------------|------------|-------|------------|--------------------|------------|
|                          |        | Mean  | SD   | Mean  | SD   | Mean   | SD   | Time        | Gender     | Time  | Gender     | p                  | $\eta_p^2$ |
|                          |        |       |      |       |      |        |      | p           | $\eta_p^2$ | p     | $\eta_p^2$ | p                  | $\eta_p^2$ |
| <b>Willingness</b>       | Male   | 10.54 | 1.90 | 11.38 | 2.40 | 11.08  | 2.33 | 0.049       | 0.177      | 0.005 | 0.22       | 0.91               | 0.00       |
|                          | Female | 12.14 | 1.42 | 12.71 | 1.79 | 12.71  | 1.23 |             |            |       |            |                    |            |
|                          | Total  | 11.53 | 1.78 | 12.21 | 2.11 | 12.09  | 1.88 |             |            |       |            |                    |            |
| <b>Perceived Ability</b> | Male   | 18.92 | 4.29 | 19.62 | 4.56 | 19.31  | 4.13 | 0.007       | 0.28       | 0.24  | 0.04       | 0.79               | 0.04       |
|                          | Female | 15.95 | 3.61 | 19.33 | 3.40 | 18.33  | 3.06 |             |            |       |            |                    |            |
|                          | Total  | 17.09 | 4.09 | 19.44 | 3.82 | 18.71  | 3.48 |             |            |       |            |                    |            |
