# Supplementary material for: Can we improve coaches’ injury prevention views and implementation practices in the community female Gaelic sport of camogie?
Source: PubMed Central journal article supplement — BMJ Open Sport Exerc Med. 2020 Apr 6;6(1):e000732. doi: 10.1136/bmjsem-2019-000732 (PMC7254110; doi:10.1136/bmjsem-2019-000732), 2020-04-06
Supplement: bmjsem-2019-000732supp002.pdf [file bmjsem-2019-000732supp002.pdf]

## Supplementary material 2. Exercises ratings post-workshop and 4-weeks post-workshop

| Exercise                   |                  | Importance         |                        | Enjoyable        |                  |                 | Difficulty               |                  |                   |                |               |
|----------------------------|------------------|--------------------|------------------------|------------------|------------------|-----------------|--------------------------|------------------|-------------------|----------------|---------------|
|                            |                  | Important<br>% (n) | Not Important<br>% (n) | Fun<br>% (n)     | Average<br>% (n) | Boring<br>% (n) | Too Challenging<br>% (n) | Fit<br>% (n)     | Too Easy<br>% (n) |                |               |
| <b>Jog</b>                 | Post<br>(n=108)  | 99.1%<br>(107)     | 0.9%<br>(1)            | Post<br>(n=101)  | 28.7%<br>(29)    | 58.4%<br>(59)   | 12.9%<br>(13)            | Post<br>(n=96)   | 1.0%<br>(1)       | 84.4%<br>(81)  | 14.6%<br>(14) |
|                            | 4-week<br>(n=23) | 100.0%<br>(23)     | 0.0%<br>(0)            | 4-week<br>(n=16) | 25.0%<br>(4)     | 56.2%<br>(9)    | 18.8%<br>(3)             | 4-week<br>(n=13) | 0.0%<br>(0)       | 92.3%<br>(12)  | 7.7%<br>(1)   |
|                            |                  |                    |                        |                  |                  |                 |                          |                  |                   |                |               |
| <b>A March</b>             | Post<br>(n=108)  | 98.1%<br>(106)     | 1.9%<br>(2)            | Post<br>(n=103)  | 57.3%<br>(59)    | 42.7%<br>(44)   | 0.0%<br>(0)              | Post<br>(n=94)   | 2.1%<br>(2)       | 92.6%<br>(87)  | 5.3%<br>(5)   |
|                            | 4-week<br>(n=21) | 100.0%<br>(21)     | 0.0%<br>(0)            | 4-week<br>(n=18) | 83.3%<br>(15)    | 11.1%<br>(2)    | 5.6%<br>(1)              | 4-week<br>(n=9)  | 0.0%<br>(0)       | 100.0%<br>(9)  | 0.0%<br>(0)   |
|                            |                  |                    |                        |                  |                  |                 |                          |                  |                   |                |               |
| <b>Running</b>             | Post<br>(n=108)  | 99.1%<br>(107)     | 0.9%<br>(1)            | Post<br>(n=97)   | 36.1%<br>(35)    | 47.4%<br>(46)   | 16.5%<br>(16)            | Post<br>(n=95)   | 3.2%<br>(3)       | 88.4%<br>(84)  | 8.4%<br>(8)   |
|                            | 4-week<br>(n=25) | 100.0%<br>(25)     | 0.0%<br>(0)            | 4-week<br>(n=9)  | 11.1%<br>(1)     | 66.7%<br>(6)    | 22.2%<br>(2)             | 4-week<br>(n=13) | 0.0%<br>(0)       | 100%<br>(13)   | 0.0%<br>(0)   |
|                            |                  |                    |                        |                  |                  |                 |                          |                  |                   |                |               |
| <b>Lateral Lunge Stops</b> | Post<br>(n=107)  | 99.1%<br>(106)     | 0.9%<br>(1)            | Post<br>(n=96)   | 45.8%<br>(44)    | 51.1%<br>(49)   | 3.1%<br>(3)              | Post<br>(n=94)   | 13.8%<br>(13)     | 83.0%<br>(78)  | 3.2%<br>(3)   |
|                            | 4-week<br>(n=24) | 100.0%<br>(24)     | 0.0%<br>(0)            | 4-week<br>(n=11) | 9.1%<br>(1)      | 81.8%<br>(9)    | 9.1%<br>(1)              | 4-week<br>(n=12) | 16.7%<br>(2)      | 83.3%<br>(10)  | 0.0%<br>(0)   |
|                            |                  |                    |                        |                  |                  |                 |                          |                  |                   |                |               |
| <b>Jump/Catch/Land</b>     | Post<br>(n=108)  | 99.1%<br>(107)     | 0.9%<br>(1)            | Post<br>(n=96)   | 64.6%<br>(62)    | 35.4%<br>(34)   | 0.0%<br>(0)              | Post<br>(n=93)   | 8.6%<br>(8)       | 90.3%<br>(84)  | 1.1%<br>(1)   |
|                            | 4-week<br>(n=26) | 100.0%<br>(26)     | 0.0%<br>(0)            | 4-week<br>(n=11) | 72.7%<br>(8)     | 27.3%<br>(3)    | 0.0%<br>(0)              | 4-week<br>(n=9)  | 0.0%<br>(0)       | 100%<br>(9)    | 0.0%<br>(0)   |
|                            |                  |                    |                        |                  |                  |                 |                          |                  |                   |                |               |
| <b>Pick Ups</b>            | Post<br>(n=108)  | 96.3%<br>(104)     | 3.7%<br>(4)            | Post<br>(n=97)   | 56.7%<br>(55)    | 40.2%<br>(39)   | 3.1%<br>(3)              | Post<br>(n=90)   | 4.4%<br>(4)       | 88.9%<br>(80)  | 6.7%<br>(6)   |
|                            | 4-week<br>(n=23) | 100%<br>(23)       | 0.0%<br>(0)            | 4-week<br>(n=15) | 60.0%<br>(9)     | 40.0%<br>(6)    | 0.0%<br>(0)              | 4-week<br>(n=11) | 0.0%<br>(0)       | 90.9%<br>(10)  | 9.1%<br>(1)   |
|                            |                  |                    |                        |                  |                  |                 |                          |                  |                   |                |               |
| <b>Partner Shuffle</b>     | Post<br>(n=107)  | 99.1%<br>(106)     | 0.9%<br>(1)            | Post<br>(n=96)   | 70.8%<br>(68)    | 26.0%<br>(25)   | 3.1%<br>(3)              | Post<br>(n=92)   | 7.6%<br>(7)       | 85.9%<br>(79)  | 6.5%<br>(6)   |
|                            | 4-week<br>(n=20) | 90.0%<br>(18)      | 10.0%<br>(2)           | 4-week<br>(n=17) | 76.5%<br>(13)    | 23.5%<br>(4)    | 0.0%<br>(0)              | 4-week<br>(n=10) | 0.0%<br>(0)       | 100.0%<br>(10) | 0.0%<br>(0)   |
|                            |                  |                    |                        |                  |                  |                 |                          |                  |                   |                |               |
| <b>Lunge Stops</b>         | Post<br>(n=106)  | 99.1%<br>(105)     | 0.9%<br>(1)            | Post<br>(n=95)   | 41.1%<br>(39)    | 51.6%<br>(49)   | 7.4%<br>(7)              | Post<br>(n=90)   | 8.9%<br>(8)       | 87.8%<br>(79)  | 3.3%<br>(3)   |
|                            | 4-week<br>(n=21) | 100.0%<br>(21)     | 0.0%<br>(0)            | 4-week<br>(n=13) | 30.8%<br>(4)     | 53.8%<br>(7)    | 15.4%<br>(2)             | 4-week<br>(n=12) | 25.0%<br>(3)      | 75.0%<br>(9)   | 0.0%<br>(0)   |
|                            |                  |                    |                        |                  |                  |                 |                          |                  |                   |                |               |
| <b>Slow Plant and Cut</b>  | Post<br>(n=106)  | 100.0%<br>(106)    | 0.0%<br>(0)            | Post<br>(n=94)   | 56.4%<br>(53)    | 36.2%<br>(34)   | 7.4%<br>(7)              | Post<br>(n=91)   | 12.1%<br>(11)     | 86.8%<br>(79)  | 1.1%<br>(1)   |
|                            | 4-week<br>(n=23) | 91.3%<br>(21)      | 8.7%<br>(2)            | 4-week<br>(n=13) | 30.8%<br>(4)     | 53.8%<br>(7)    | 15.4%<br>(2)             | 4-week<br>(n=11) | 9.1%<br>(1)       | 81.8%<br>(9)   | 9.1%<br>(1)   |
|                            |                  |                    |                        |                  |                  |                 |                          |                  |                   |                |               |

|                                |         |        |      |        |       |       |       |        |       |       |      |
|--------------------------------|---------|--------|------|--------|-------|-------|-------|--------|-------|-------|------|
| <b>Squat Stops</b>             | Post    | 99.1%  | 0.9% | Post   | 42.9% | 50.0% | 7.1%  | Post   | 6.7%  | 92.2% | 1.1% |
|                                | (n=106) | (105)  | (1)  | (n=98) | (42)  | (49)  | (7)   | (n=90) | (6)   | (83)  | (1)  |
|                                | 4-week  | 100.0% | 0.0% | 4-week | 35.7% | 57.1% | 7.2%  | 4-week | 8.3%  | 91.7% | 0.0% |
| <b>Arabesque</b>               | (n=20)  | (20)   | (0)  | (n=14) | (5)   | (8)   | (1)   | (n=12) | (1)   | (11)  | (0)  |
|                                | Post    | 97.1%  | 2.9% | Post   | 64.1% | 28.3% | 7.6%  | Post   | 14.1% | 85.9% | 0.0% |
|                                | (n=104) | (101)  | (3)  | (n=92) | (59)  | (36)  | (7)   | (n=92) | (13)  | (79)  | (0)  |
| <b>Leg Swings</b>              | 4-week  | 100.0% | 0.0% | 4-week | 60.0% | 33.3% | 6.7%  | 4-week | 22.2% | 77.8% | 0.0% |
|                                | (n=21)  | (21)   | (0)  | (n=15) | (9)   | (5)   | (1)   | (n=9)  | (2)   | (7)   | (0)  |
|                                | Post    | 95.3%  | 4.7% | Post   | 64.9% | 32.0% | 3.1%  | Post   | 4.4%  | 90.0% | 5.6% |
| <b>Partner push into lunge</b> | (n=106) | (101)  | (5)  | (n=97) | (63)  | (31)  | (3)   | (n=90) | (4)   | (81)  | (5)  |
|                                | 4-week  | 90.9%  | 9.1% | 4-week | 56.3% | 37.5% | 6.2%  | 4-week | 0.0%  | 92.3% | 7.7% |
|                                | (n=22)  | (20)   | (2)  | (n=16) | (9)   | (6)   | (1)   | (n=13) | (0)   | (12)  | (1)  |
| <b>Nordic Hamstring Curl</b>   | Post    | 90.5%  | 9.5% | Post   | 70.8% | 22.9% | 6.3%  | Post   | 14.3% | 81.3% | 4.4% |
|                                | (n=105) | (95)   | (10) | (n=96) | (68)  | (22)  | (6)   | (n=91) | (13)  | (74)  | (4)  |
|                                | 4-week  | 95.0%  | 5.0% | 4-week | 66.7% | 26.7% | 6.6%  | 4-week | 21.4% | 78.6% | 0.0% |
| <b>Front plank</b>             | (n=20)  | (19)   | (1)  | (n=15) | (10)  | (4)   | (1)   | (n=14) | (3)   | (11)  | (0)  |
|                                | Post    | 91.3%  | 8.7% | Post   | 57.9% | 35.8% | 6.3%  | Post   | 28.7% | 69.1% | 2.1% |
|                                | (n=104) | (95)   | (9)  | (n=95) | (55)  | (34)  | (6)   | (n=94) | (27)  | (65)  | (2)  |
| <b>Side plank</b>              | 4-week  | 100%   | 0.0% | 4-week | 50.0% | 50.0% | 0.0%  | 4-week | 53.3% | 46.7% | 0.0% |
|                                | (n=23)  | (23)   | (0)  | (n=10) | (5)   | (5)   | (0)   | (n=15) | (8)   | (7)   | (0)  |
|                                | Post    | 95.2%  | 4.8% | Post   | 37.5% | 52.1% | 10.4% | Post   | 22.3% | 76.6% | 1.1% |
| <b>Split Squats</b>            | (n=104) | (99)   | (5)  | (n=96) | (36)  | (50)  | (10)  | (n=94) | (21)  | (72)  | (1)  |
|                                | 4-week  | 100%   | 0.0% | 4-week | 36.4% | 45.4% | 18.2% | 4-week | 15.4% | 84.6% | 0.0% |
|                                | (n=26)  | (26)   | (0)  | (n=11) | (4)   | (5)   | (2)   | (n=13) | (2)   | (11)  | (0)  |
| <b>Lateral Hop and Hold</b>    | Post    | 92.4%  | 7.6% | Post   | 37.5% | 50.0% | 12.5% | Post   | 32.6% | 66.3% | 1.1% |
|                                | (n=105) | (97)   | (8)  | (n=96) | (36)  | (48)  | (12)  | (n=92) | (30)  | (61)  | (1)  |
|                                | 4-week  | 100%   | 0.0% | 4-week | 30.0% | 60.0% | 10.0% | 4-week | 35.3% | 64.7% | 0.0% |
| <b>Prisoner Squats</b>         | (n=21)  | (21)   | (0)  | (n=10) | (3)   | (6)   | (1)   | (n=17) | (6)   | (11)  | (0)  |
|                                | Post    | 96.1%  | 3.9% | Post   | 46.3% | 46.3% | 7.4%  | Post   | 15.1% | 84.9% | 0.0% |
|                                | (n=102) | (98)   | (4)  | (n=95) | (44)  | (44)  | (7)   | (n=93) | (14)  | (79)  | (0)  |
| <b>Counter Movement Jump</b>   | 4-week  | 90.9%  | 9.1% | 4-week | 18.2% | 54.5% | 27.3% | 4-week | 38.9% | 61.1% | 0.0% |
|                                | (n=22)  | (20)   | (2)  | (n=11) | (2)   | (6)   | (3)   | (n=18) | (7)   | (11)  | (0)  |
|                                | Post    | 97.1%  | 2.9% | Post   | 58.5% | 36.2% | 5.3%  | Post   | 15.2% | 83.7% | 1.1% |
| <b>Prisoner Squats</b>         | (n=103) | (100)  | (3)  | (n=94) | (55)  | (34)  | (5)   | (n=92) | (14)  | (77)  | (1)  |
|                                | 4 Week  | 100%   | 0.0% | 4 Week | 53.8% | 46.2% | 0.0%  | 4-week | 23.1% | 76.9% | 0.0% |
|                                | (n=22)  | (22)   | (0)  | (n=13) | (7)   | (6)   | (0)   | (n=13) | (3)   | (10)  | (0)  |
| <b>Counter Movement Jump</b>   | Post    | 95.2%  | 4.8% | Post   | 47.4% | 48.5% | 4.1%  | Post   | 13.2% | 86.8% | 0.0% |
|                                | (n=104) | (99)   | (5)  | (n=97) | (46)  | (47)  | (4)   | (n=91) | (12)  | (79)  | (0)  |
|                                | 4-week  | 94.7%  | 5.3% | 4-week | 27.3% | 63.6% | 9.1%  | 4-week | 33.3% | 66.7% | 0.0% |
| <b>Counter Movement Jump</b>   | (n=19)  | (18)   | (1)  | (n=11) | (3)   | (7)   | (1)   | (n=15) | (5)   | (10)  | (0)  |
|                                | Post    | 99.0%  | 1.0% | Post   | 53.7% | 43.2% | 3.2%  | Post   | 14.4% | 84.5% | 1.1% |

|                             |         |        |      |        |       |       |       |        |       |        |      |
|-----------------------------|---------|--------|------|--------|-------|-------|-------|--------|-------|--------|------|
|                             | (n=105) | (104)  | (1)  | (n=95) | (51)  | (41)  | (3)   | (n=90) | (13)  | (76)   | (1)  |
|                             | 4-week  | 95.5%  | 4.5% | 4-week | 27.3% | 63.6% | 9.1%  | 4-week | 28.6% | 71.4%  | 0.0% |
| <b>High Skips</b>           | (n=22)  | (21)   | (1)  | (n=11) | (3)   | (7)   | (1)   | (n=14) | (4)   | (10)   | (0)  |
|                             | Post    | 100.0% | 0.0% | Post   | 64.9% | 31.9% | 3.2%  | Post   | 7.7%  | 87.9%  | 4.4% |
|                             | (n=105) | (105)  | (0)  | (n=94) | (61)  | (30)  | (3)   | (n=91) | (7)   | (80)   | (4)  |
|                             | 4-week  | 100.0% | 0.0% | 4-week | 73.3% | 20.0% | 6.7%  | 4-week | 0.0%  | 100.0% | 0.0% |
| <b>Two Forward One Back</b> | (n=19)  | (19)   | (0)  | (n=15) | (11)  | (3)   | (1)   | (n=10) | (0)   | (10)   | (0)  |
|                             | Post    | 96.2%  | 3.8% | Post   | 58.3% | 38.5% | 3.1%  | Post   | 6.7%  | 89.9%  | 3.4% |
|                             | (n=106) | (102)  | (4)  | (n=96) | (56)  | (37)  | (3)   | (n=89) | (6)   | (80)   | (3)  |
|                             | 4-week  | 95.2%  | 4.8% | 4-week | 66.7% | 25.0% | 8.3%  | 4-week | 0.0%  | 90.9%  | 9.1% |
| <b>Bounds</b>               | (n=21)  | (20)   | (1)  | (n=12) | (8)   | (3)   | (1)   | (n=11) | (0)   | (10)   | (1)  |
|                             | Post    | 96.2%  | 3.8% | Post   | 61.1% | 34.7% | 4.2%  | Post   | 12.0% | 85.9%  | 2.1% |
|                             | (n=105) | (101)  | (4)  | (n=95) | (58)  | (33)  | (4)   | (n=92) | (11)  | (79)   | (2)  |
|                             | 4-week  | 91.3%  | 8.7% | 4-week | 41.7% | 50.0% | 8.3%  | 4-week | 0.0%  | 100.0% | 0.0% |
| <b>Fast Plant and Cut</b>   | (n=23)  | (21)   | (2)  | (n=12) | (5)   | (6)   | (1)   | (n=11) | (0)   | (11)   | (0)  |
|                             | Post    | 98.1%  | 1.9% | Post   | 58.9% | 35.8% | 5.3%  | Post   | 16.9% | 82.0%  | 1.1% |
|                             | (n=105) | (103)  | (2)  | (n=95) | (56)  | (34)  | (5)   | (n=89) | (15)  | (73)   | (1)  |
|                             | 4-week  | 96.4%  | 3.6% | 4-week | 45.5% | 54.5% | 0.0%  | 4-week | 11.1% | 88.9%  | 0.0% |
| <b>One on One</b>           | (n=28)  | (27)   | (1)  | (n=11) | (5)   | (6)   | (0)   | (n=9)  | (1)   | (8)    | (0)  |
|                             | Post    | 97.2%  | 2.8% | Post   | 63.8% | 33.0% | 3.2%  | Post   | 8.0%  | 92.0%  | 0.0% |
|                             | (n=106) | (103)  | (3)  | (n=94) | (60)  | (31)  | (3)   | (n=88) | (7)   | (81)   | (0)  |
|                             | 4-week  | 100%   | 0.0% | 4-week | 50.0% | 41.7% | 8.3%  | 4-week | 0.0%  | 100.0% | 0.0% |
| <b>Fast Feet shuffle</b>    | (n=22)  | (22)   | (0)  | (n=12) | (6)   | (5)   | (1)   | (n=10) | (0)   | (10)   | (0)  |
|                             | Post    | 98.1%  | 1.9% | Post   | 67.0% | 28.9% | 4.1%  | Post   | 10.0% | 90.0%  | 0.0% |
|                             | (n=106) | (104)  | (2)  | (n=97) | (65)  | (28)  | (4)   | (n=90) | (9)   | (81)   | (0)  |
|                             | 4-week  | 100.0% | 0.0% | 4-week | 70.0% | 30.0% | 0.0%  | 4-week | 9.1%  | 81.8%  | 9.1% |
| <b>Dynamic Lunge</b>        | (n=24)  | (24)   | (0)  | (n=10) | (7)   | (3)   | (0)   | (n=11) | (1)   | (9)    | (1)  |
|                             | Post    | 97.1%  | 2.9% | Post   | 50.0% | 44.7% | 5.3%  | Post   | 18.7% | 81.3%  | 0.0% |
|                             | (n=105) | (102)  | (3)  | (n=94) | (47)  | (42)  | (5)   | (n=91) | (17)  | (74)   | (0)  |
|                             | 4-week  | 100%   | 0.0% | 4-week | 44.4% | 44.4% | 11.2% | 4-week | 28.6% | 71.4%  | 0.0% |
|                             | (n=23)  | (23)   | (0)  | (n=9)  | (4)   | (4)   | (1)   | (n=14) | (4)   | (10)   | (0)  |

Post; post-workshop. 4-week; Four week follow up.
